# Supplementary material
Source: HighWire-hosted journal article supplement (https://bjsm.bmj.com/content/53/9/560)
Supplement: inline-supplementary-material-1 [file inline-supplementary-material-1.docx]

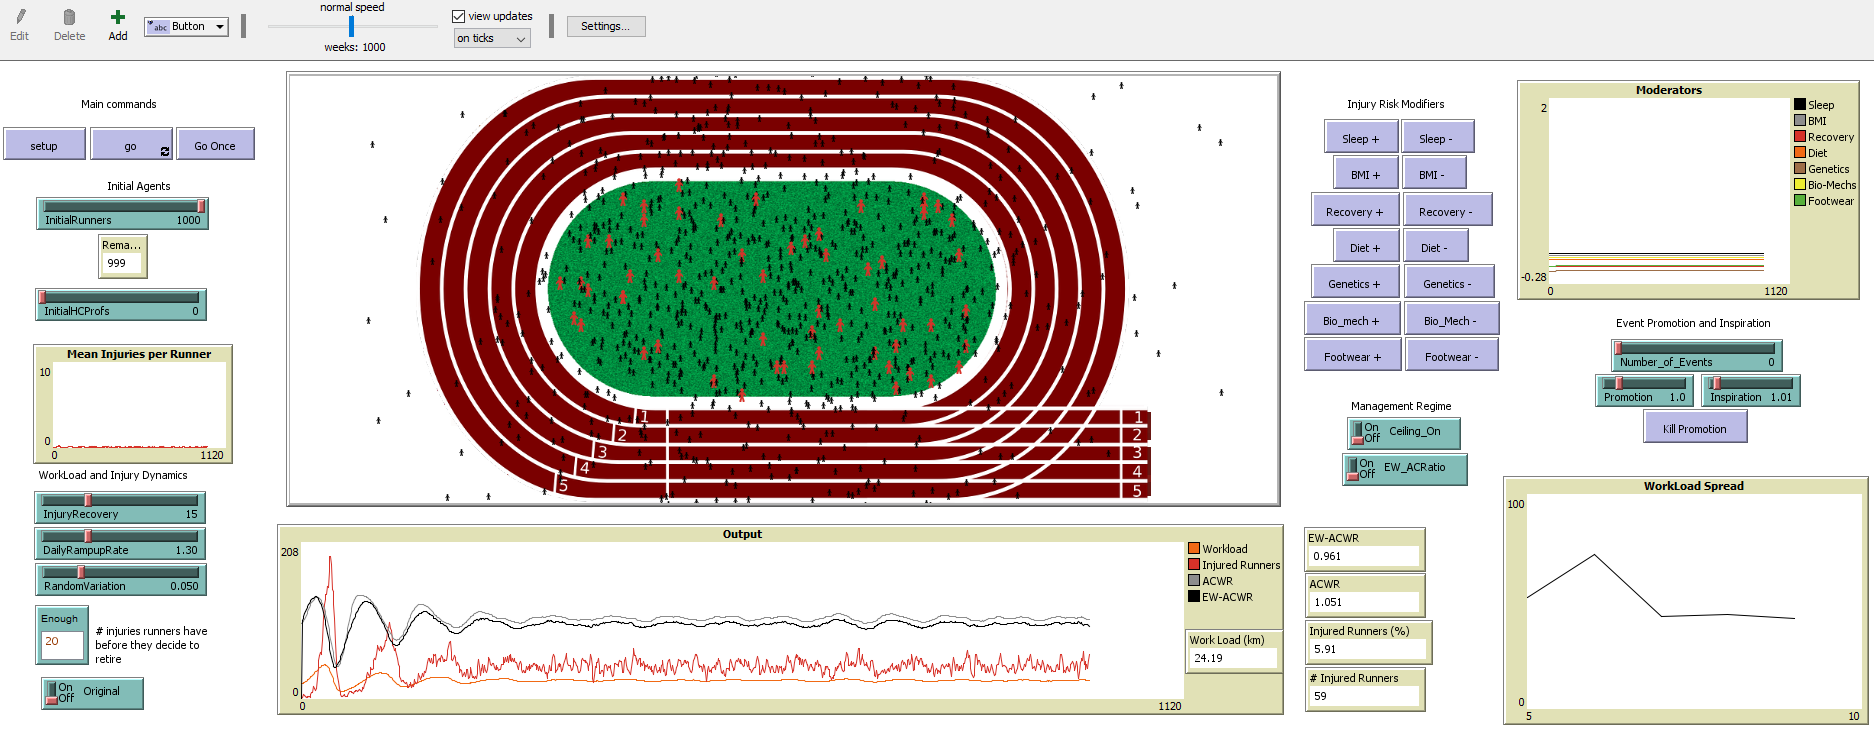


**Figure 1: The distance running NetLogo interface and simulation environment.** The distance running ABM includes several types of interface items, including buttons, switches, sliders, monitors, counts, and dynamic plots.
